# Supplementary material
Source: PubMed Central journal article supplement (PMC8193415)
Supplement: 12250_2016_3730_MOESM1_ESM.pdf [file 12250_2016_3730_MOESM1_ESM.pdf]

## Electronic Supplementary Material

# Assembly of long DNA sequences using a new synthetic *Escherichia coli*–yeast shuttle vector

Zheng Hou<sup>#</sup>, Zheng Zhou<sup>#</sup>, Zonglin Wang, Gengfu Xiao<sup>✉</sup>

State Key Laboratory of Virology, Wuhan Institute of Virology, Chinese Academy of Sciences, Wuhan 430071, China

Supporting information to DOI: 10.1007/s12250-016-3730-8

Table S1. Primers used for PCR amplification of *pGF* vectors and fragments

| Primer name                                                            | Sequences                                                            | nt |
|------------------------------------------------------------------------|----------------------------------------------------------------------|----|
| <i>Primers used for amplification of pGF vectors</i>                   |                                                                      |    |
| XAF-1                                                                  | GCTCGTAGATCGTCATGGTTTGTTCACCTGGTAGTTCgcgcccgcatcctctagagtcgacctg     | 68 |
| XAR-1                                                                  | AAGCTTAGGTACTTCTGGTAACGGTTTACGAGTGACGACAgcgcccgccgggtaccgagctcgaattc | 68 |
| XBF-1                                                                  | CCTCCTGGTCGTACAGCAACACCAACTAGACGACTACCGCgcgcccgcatcctctagagtcgacctg  | 68 |
| XBR-1                                                                  | GTGACGGAGCGTCGTAGAGAACGGTAGCTCGTGACGGTTGcgcccgccgggtaccgagctcgaattc  | 68 |
| XCF-1                                                                  | AAAGCGAAGACTTGCCCGAACTCCCGTCACTTGAAGACACgcgcccgcatcctctagagtcgacctg  | 68 |
| XCR-1                                                                  | GCTGGCCGACCTGCTCGACGCTATCGAAGACGACGCACAGcgcccgccgggtaccgagctcgaattc  | 68 |
| <i>Primers used for amplification of fragments A1-A4, B1-B4, C1-C2</i> |                                                                      |    |
| AF1                                                                    | GAACTACCAGGTGAGAAACAAACCATG                                          | 27 |
| AR1                                                                    | ACCATCGTTACAGGTTTTAACATCGG                                           | 26 |
| AF2                                                                    | TGACTTGGCACGGTGTACTAGGTCAC                                           | 26 |
| AR2                                                                    | GCTGCTACGTTTGTAGACCTAACCTATAAG                                       | 30 |
| AF3                                                                    | TCTGATAGCATCATCAAAGCCGTTAC                                           | 26 |
| AR3                                                                    | ACCTATGTTGTCTGGTCGGTCGTTT                                            | 25 |
| AF4                                                                    | CTTTGATGATGACAGCCGTAGGTTT                                            | 25 |
| AR4                                                                    | TGTCGTCACCTCGTAAACCGTTACCAG                                          | 26 |
| BF1                                                                    | GCGGTAGTCGTCTAGTTGGTGTTG                                             | 24 |
| BR1                                                                    | CACAGTGGAACCAACAACACTACTAGAAGC                                       | 28 |
| BF2                                                                    | GGTACGTAAGCTTGAGATCACCTCT                                            | 26 |
| BR2                                                                    | GTACTIONGACAACGAAGATGTGCTACC                                         | 27 |
| BF3                                                                    | CTACTAAGTCATCTACATCCTGACCAGAAGC                                      | 31 |
| BR3                                                                    | GAAAAGCAAGCACAACGAGCTAAGC                                            | 25 |
| BF4                                                                    | ACAGCTTGTGTCTTTTTCTTTCACGTATC                                        | 30 |
| BR4                                                                    | CAACCGTCACGAGCTACCGTTC                                               | 22 |
| CF1                                                                    | GTGTCTTCAAGTGACGGGAGTTTCG                                            | 24 |
| CR1                                                                    | ATGCTTGTCTAGACCCTGCTGTG                                              | 24 |
| CF2                                                                    | TCGTTGTCTGTAACCACCTACGGTC                                            | 24 |
| CR2                                                                    | CTGTGCGTCGTCTTCGATAGCGTCGAG                                          | 27 |

Table S2. Primers designed to amplify the sequences across the adjacent DNA fragments

| Primer name | Sequences                  | nt |
|-------------|----------------------------|----|
| FV          | CCCAGGCTTTACACTTTATGCTTC   | 24 |
| RA1         | GCAACCGACACACAGCCTCTT      | 21 |
| FA1         | TACACGGGTGGGGTGTAGTACC     | 23 |
| RA2         | CTTCTGCTTTTGAAAGACCTCCTCT  | 25 |
| FA2         | CTGGGTCGTACATGATAGCTGCTG   | 24 |
| RA3         | TGGTCACTTACAACGTATCATCCCT  | 25 |
| FA3         | CTTGTTACCTCGTCTACTAACCG    | 24 |
| RA4         | AGTGCTACTAACTGGGTTGTCGATG  | 25 |
| FA4         | GTTCTACAGAAGGACGTGGTTGTGT  | 25 |
| RB1         | GTAACAACAGCTACACTGTGGCTG   | 24 |
| FB1         | CTGTGCTCGTTGTCGTTCTACTG    | 23 |
| RB2         | AGAAGGGTGAGATAACAACGCTTTG  | 24 |
| FB2         | CACAGAGTTTCCACGAAGCCTC     | 22 |
| RB3         | CTTCAAGTAGTGCCTTACGACAACG  | 25 |
| FB3         | CCTTGTCGTTTACTGACGTTACCAC  | 25 |
| RB4         | GTTATCAAACGTGCGTCTTACCTCA  | 25 |
| FB4         | TTTTCCAGAGTTTACGCACCTC     | 23 |
| RC1         | TAGTTCCTATCGGAAGCGACCAT    | 23 |
| FC1         | GAAGTTGTACACTTTGGCGGGAG    | 23 |
| RC2         | CTATCACTACAACCCAGTAGCCAACA | 26 |
| FC2         | GGGCAAGGCTCTTAGGGTCTTCATTC | 26 |
| RV          | GTGAAATACCACACAGATGCGTAAG  | 25 |
